# Supplementary material for: Assessing the optimized precision of the aircraft mass balance method for measurement of urban greenhouse gas emission rates through averaging
Source: Oxford University Press journal article supplement (doi:10.1525/elementa.134), 2017-01-01

## Supplementary material:

**Figure S1: CRDS calibration**

Y-intercepts and slopes from calibration curves for CO<sub>2</sub> (a) and CH<sub>4</sub> (b). Calibrations of the CRDS were performed in-flight using three different NOAA ESRL certified standards.

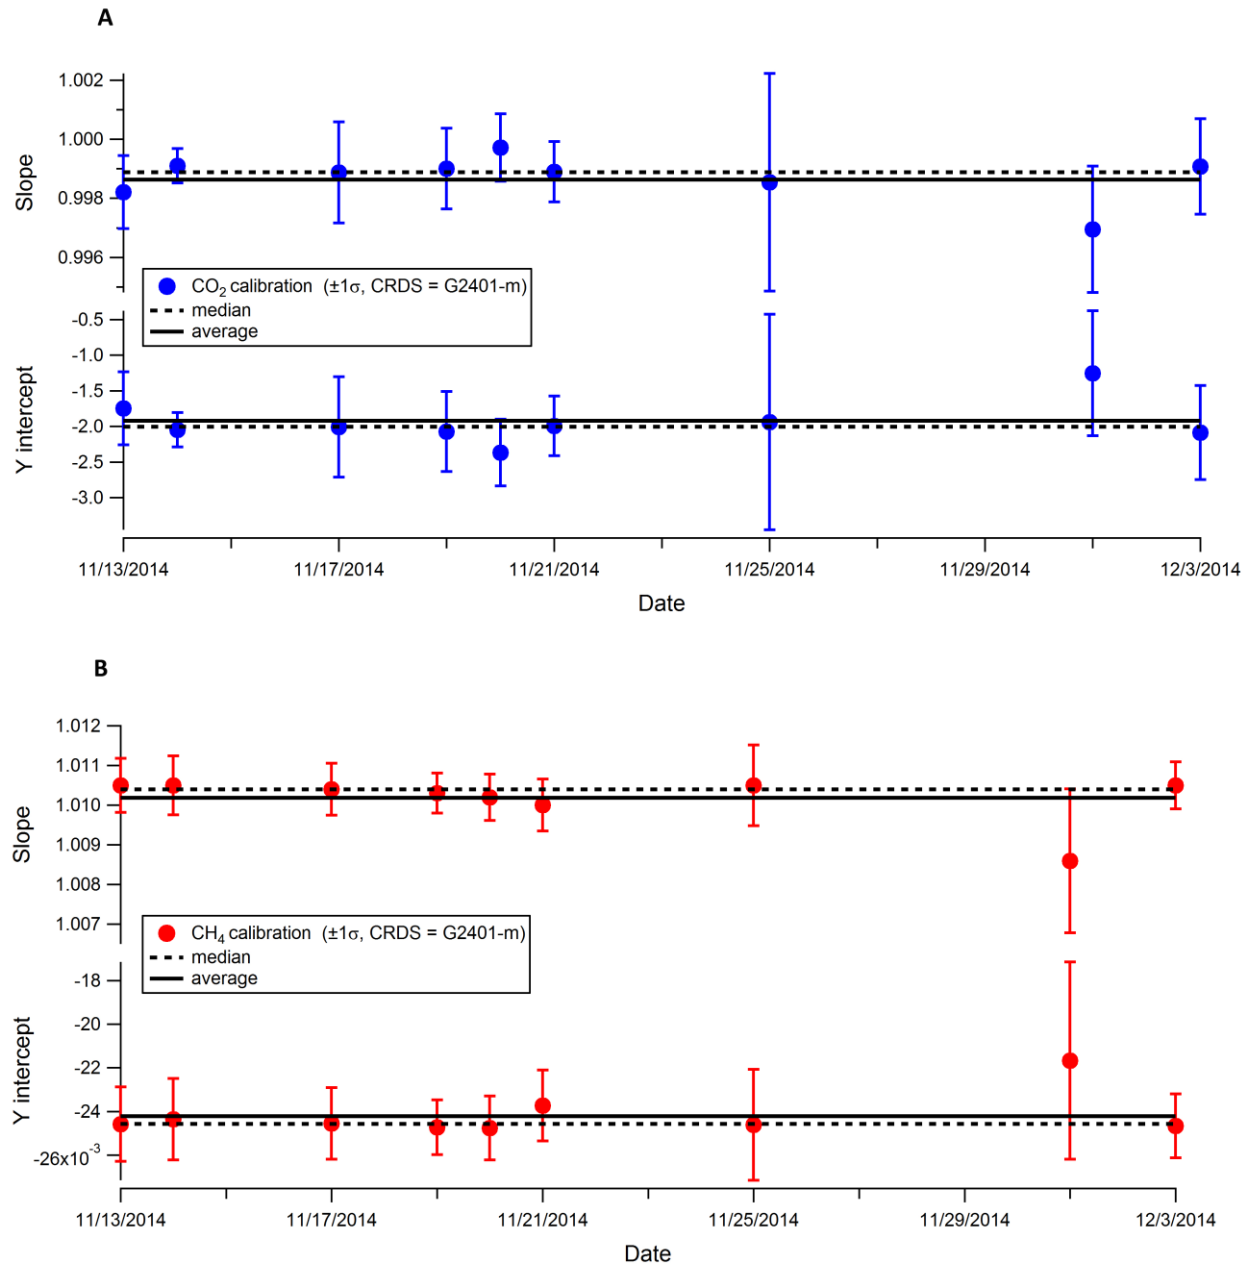

Supplement: elementa-5-134-s2.pdf [file elementa-5-134-s2.pdf]
